# Supplementary material
Source: publisher site journal article supplement (https://www.dovepress.com/article/447387)
Supplement: Supplementary file 1 [file get_supplementary_file.php]

Supplementary Table 1 Baseline characteristics of patients in the imaging remission and nonremission groups.

| Variables | remission (n=60) | nonremission (n=112) | *P*-value | Variables | | remission (n=60) | nonremission (n=112) | *P*-value |
| --- | --- | --- | --- | --- | --- | --- | --- | --- |
| Sex |  |  |  | Child-Pugh class |  | |  |  |
| Male | 51 (85.0%) | 102 (91.1%) | 0.226 | A | 53 (88.3%) | | 105 (93.8%) | 0.344 |
| Female | 9 (15.0%) | 10 (8.9%) |  | B | 7 (11.7%) | | 7 (6.3%) |  |
| Age |  |  |  | ALBI grade |  | |  |  |
| ≤50 | 34 (56.7%) | 54 (48.2%) | 0.291 | 1 | 40 (66.7%) | | 82 (73.2%) | 0.367 |
| >50 | 26 (43.3%) | 58 (51.8%) |  | 2 | 20 (33.3%) | | 30 (26.8%) |  |
| ECOG |  |  |  | AFP, ng/ml |  | |  |  |
| 0 | 28 (46.7%) | 7 (6.3%) | <0.001 | ≤400 | 16 (26.7%) | | 54 (48.2%) | 0.006 |
| 1-2 | 32 (53.3%) | 105 (93.8%) |  | >400 | 44 (73.3%) | | 58 (51.8%) |  |
| HBsAg |  |  |  | Albumin, g/l |  | |  |  |
| Positive | 53 (88.3%) | 100 (89.3%) | 0.849 | ≤40 | 18 (30.0%) | | 30 (26.8%) | 0.654 |
| Negative | 7 (11.7%) | 12 (10.7%) |  | >40 | 42 (70.0%) | | 82 (73.2%) |  |
| Tumor size |  |  |  | Total bilirubin, μmol/l |  | |  |  |
| ≤10 | 59 (98.3%) | 74 (66.1%) | <0.001 | ≤20 | 44 (73.3%) | | 84 (75.0%) | 0.811 |
| >10 | 1 (1.7%) | 38 (33.9%) |  | >20 | 16 (26.7%) | | 28 (25.0%) |  |
| Tumor number |  |  |  | ALT, U/l |  | |  |  |
| ≤3 | 21 (35.0%) | 12 (10.7%) | <0.001 | ≤50 | 37 (61.7%) | | 73 (65.2%) | 0.648 |
| >3 | 39 (65.0%) | 100 (89.3%) |  | >50 | 23 (38.3%) | | 39 (34.8%) |  |
| PVTT |  |  |  | AST, U/l |  | |  |  |
| Absent | 21 (35.0%) | 55 (49.1%) | 0.076 | ≤60 | 29 (48.3%) | | 62 (55.4%) | 0.379 |
| Present | 39 (65.0%) | 57 (50.9%) |  | >60 | 31 (51.7%) | | 50 (44.6%) |  |
| HVTT |  |  |  | Follow-up treatment |  | |  |  |
| Absent | 41 (68.3%) | 85 (75.9%) | 0.286 | BSC | 32 (53.3%) | | 75 (67.0%) | 0.127 |
| Present | 19 (31.7%) | 27 (24.1%) |  | Ablation | 6 (10.0%) | | 5 (4.5%) |  |
| Metastasis |  |  |  | TACE | 3 (5.0%) | | 9 (8.0%) |  |
| Absent | 49 (81.7%) | 97 (86.6%) | 0.389 | Systemic therapy | 4 (6.7%) | | 9 (8.0%) |  |
| Present | 11 (18.3%) | 15 (13.4%) |  | Combination therapy | 15 (25.0%) | | 14 (12.5%) |  |
| BCLC stage |  |  |  |  |  | |  |  |
| A/B | 12 (20.0%) | 40 (35.7%) | 0.032 |  |  | |  |  |
| C | 48 (80.0%) | 72 (64.3%) |  |  |  | |  |  |

PVTT, portal vein tumor thrombosis; HVTT, hepatic vein tumor thrombosis; BCLC stage, Barcelona Clinic Liver Cancer stage; ALBI grade, albumin-bilirubin grade; AFP, alpha-fetoprotein level; ALT, alanine aminotransferase; AST, aspartate aminotransferase; BSC, best supportive care; TACE, transcatheter arterial chemoembolization; Systemic therapy, including systemic chemotherapy, immunotherapy, and target therapy; Combination therapy, combining two or more therapy.

Supplementary Table 2 Baseline characteristics of patients in the maintenance and conversion surgery groups.

| Variables | maintenance (n=35) | conversion surgery (n=25) | *P*-value | Variables | maintenance (n=35) | conversion surgery (n=25) | *P*-value |
| --- | --- | --- | --- | --- | --- | --- | --- |
| Sex |  |  |  | Child-Pugh class |  |  |  |
| Male | 32 (91.4%) | 19 (76.0%) | 0.199 | A | 33 (94.3%) | 20 (80.0%) | 0.117 |
| Female | 3 (8.6%) | 6 (24.0%) |  | B | 2 (5.7%) | 5 (20.0%) |  |
| Age |  |  |  | ALBI grade |  |  |  |
| ≤50 | 34 (56.7%) | 54 (48.2%) | 0.538 | 1 | 20 (57.1%) | 20 (80.0%) | 0.064 |
| >50 | 26 (43.3%) | 58 (51.8%) |  | 2 | 15 (42.9%) | 5 (20.0%) |  |
| ECOG |  |  |  | AFP, ng/ml |  |  |  |
| 0 | 7 (20.0%) | 21 (84.0%) | <0.001 | ≤400 | 9 (25.7%) | 7 (28.0%) | 0.844 |
| 1-2 | 28 (80.0%) | 4 (16.0%) |  | >400 | 26 (74.3%) | 18 (72.0%) |  |
| HBsAg |  |  |  | Albumin, g/l |  |  |  |
| Positive | 28 (80.0%) | 25 (100.0%) | 0.035 | ≤40 | 14 (40.0%) | 4 (16.0%) | 0.046 |
| Negative | 7 (20.0%) | 0 (0.0%) |  | >40 | 21 (60.0%) | 21 (84.0%) |  |
| Tumor size |  |  |  | Total bilirubin, μmol/l |  |  |  |
| ≤10 | 34 (97.1%) | 25 (100.0%) | 1 | ≤20 | 25 (71.4%) | 19 (76.0%) | 0.693 |
| >10 | 1 (2.9%) | 0 (0.0%) |  | >20 | 10 (28.6%) | 6 (24.0%) |  |
| Tumor number |  |  |  | ALT, U/l |  |  |  |
| ≤3 | 2 (5.7%) | 19 (76.0%) | <0.001 | ≤50 | 20 (57.1%) | 17 (68.0%) | 0.394 |
| >3 | 33 (94.3%) | 6 (24.0%) |  | >50 | 15 (42.9%) | 8 (32.0%) |  |
| PVTT |  |  |  | AST, U/l |  |  |  |
| Absent | 14 (40.0%) | 7 (28.0%) | 0.337 | ≤60 | 14 (40.0%) | 15 (60.0%) | 0.126 |
| Present | 21 (60.0%) | 18 (72.0%) |  | >60 | 21 (60.0%) | 10 (40.0%) |  |
| HVTT |  |  |  | Follow-up treatment |  |  |  |
| Absent | 20 (57.1%) | 21 (84.0%) | 0.027 | BSC | 24 (68.6%) | 8 (32.0%) | 0.019 |
| Present | 15 (42.9%) | 4 (16.0%) |  | Ablation | 1 (2.9%) | 5 (20.0%) |  |
| Metastasis |  |  |  | TACE | 1 (2.9%) | 2 (8.0%) |  |
| Absent | 24 (68.6%) | 25 (100.0%) | 0.006 | Systemic therapy | 1 (2.9%) | 3 (12.0%) |  |
| Present | 11 (31.4%) | 0 (0.0%) |  | Combination therapy | 8 (22.9%) | 7 (28.0%) |  |
| BCLC stage |  |  |  |  |  |  |  |
| A/B | 4 (11.4%) | 8 (32.0%) | 0.05 |  |  |  |  |
| C | 31 (88.6%) | 17 (68.0%) |  |  |  |  |  |

PVTT, portal vein tumor thrombosis; HVTT, hepatic vein tumor thrombosis; BCLC stage, Barcelona Clinic Liver Cancer stage; ALBI grade, albumin-bilirubin grade; AFP, alpha-fetoprotein level; ALT, alanine aminotransferase; AST, aspartate aminotransferase; BSC, best supportive care; TACE, transcatheter arterial chemoembolization; Systemic therapy, including systemic chemotherapy, immunotherapy, and target therapy; Combination therapy, combining two or more therapy.
